# Supplementary material for: Neuropsychiatric symptoms in limbic-predominant age-related TDP-43 encephalopathy and Alzheimer’s disease
Source: PubMed Central journal article supplement (PMC7805786; doi:10.1093/brain/awaa315), 2020-11-14
Supplement: awaa315_supplementary_data.pdf [file awaa315_supplementary_data.pdf]

## SUPPLEMENTARY MATERIAL

**Supplementary Table 1: Description of the Neuropsychiatric Inventory (NPI) subscales.**

| NPI subscale          | Description                                                                                                                                                                                       |
|-----------------------|---------------------------------------------------------------------------------------------------------------------------------------------------------------------------------------------------|
| Delusions             | Does the patient have false beliefs, such as thinking that others are stealing from him/her or planning to harm him/her in some way?                                                              |
| Hallucinations        | Does the patient have hallucinations such as false visions or voices? Does he or she seem to hear or see things that are not present?                                                             |
| Agitation/Aggression  | Is the patient resistive to help from others at times, or hard to handle?                                                                                                                         |
| Depression/Dysphoria  | Does the patient seem sad or say that he /she is depressed?                                                                                                                                       |
| Anxiety               | Does the patient become upset when separated from you? Does he/she have any other signs of nervousness such as shortness of breath, sighing, being unable to relax, or feeling excessively tense? |
| Elation/euphoria      | Does the patient appear to feel too good or act excessively happy?                                                                                                                                |
| Apathy/indifference   | Does the patient seem less interested in his/her usual activities or in the activities and plans of others?                                                                                       |
| Disinhibition         | Does the patient seem to act impulsively, for example, talking to strangers as if he/she knows them, or saying things that may hurt people's feelings?                                            |
| Irritability/lability | Is the patient impatient and cranky? Does he/she have difficulty coping with delays or waiting for planned activities?                                                                            |
| Motor disturbance     | Does the patient engage in repetitive activities such as pacing around the house, handling buttons, wrapping string, or doing other things repeatedly?                                            |
| Nighttime behaviors   | Does the patient awaken you during the night, rise too early in the morning, or take excessive naps during the day?                                                                               |
| Appetite/eating       | Has the patient lost or gained weight, or had a change in the type of food he/she likes?                                                                                                          |

**Supplementary Table 2: Drugs included in each psychotropic medication group.** Lower case, upper case and title case capitalization for each word were included in the search.

| Psychotropic medication group | Drug names included in search                                                                               |
|-------------------------------|-------------------------------------------------------------------------------------------------------------|
| Antidepressants               | citalopram, trazodone, “triptyline”, venlafaxine, dosulepin, “oxetine”, phenelzine, sertraline, mirtazapine |
| Antipsychotics                | olanzapine, risperidone, aripiprazole, quetiapine, haloperidol, amisulpride, sulpiride                      |
| Benzodiazepines               | “iazepam”, lorazepam, midazolam, “emazepam”, alprazolam, “lonazepam”, “itrazepam”                           |
| Z-drugs                       | zopiclone, zolpidem, zaleplon                                                                               |

**Supplementary Table 3: Follow up assessment frequency for the NPI sample (N=131)**

|                        |    |    |    |    |   |   |   |   |
|------------------------|----|----|----|----|---|---|---|---|
| Number of assessments  | 1  | 2  | 3  | 4  | 5 | 6 | 7 | 8 |
| Number of participants | 44 | 27 | 25 | 17 | 9 | 0 | 8 | 1 |

**Supplementary Table 4: Detailed neuropathological data and cognitive status of LATE-NC donors from the BDR cohort.** Participants 1-14 were included in the analysis and participants 15-21 (bold, italic font) were excluded from the analysis due to missing NPI data. Participant 14 had missing neuropathological and cognitive status data (NA). Neg= negative, MCI = mild cognitive impairment.

| Participant | Thal phase | Braak stage | CERAD score | Cognitive status          |
|-------------|------------|-------------|-------------|---------------------------|
| 1           | 5          | 4           | B           | Dementia                  |
| 2           | 5          | 4           | B           | Dementia                  |
| 3           | 3          | 4           | B           | Dementia                  |
| 4           | 5          | 4           | C           | Dementia                  |
| 5           | 4          | 4           | B           | Dementia                  |
| 6           | 5          | 4           | C           | Dementia                  |
| 7           | 5          | 4           | B           | Dementia                  |
| 8           | 4          | 4           | B           | Dementia                  |
| 9           | 4          | 1           | A           | Dementia                  |
| 10          | 3          | 4           | B           | Dementia                  |
| 11          | 2          | 3           | neg         | MCI                       |
| 12          | 4          | 4           | B           | No dementia               |
| 13          | 4          | 4           | B           | No dementia               |
| 14          | NA         | NA          | NA          | NA                        |
| <b>15</b>   | <b>2</b>   | <b>1</b>    | <b>A</b>    | <b><i>Dementia</i></b>    |
| <b>16</b>   | <b>3</b>   | <b>4</b>    | <b>B</b>    | <b><i>Dementia</i></b>    |
| <b>17</b>   | <b>1</b>   | <b>2</b>    | <b>neg</b>  | <b><i>MCI</i></b>         |
| <b>18</b>   | <b>1</b>   | <b>1</b>    | <b>neg</b>  | <b><i>No dementia</i></b> |
| <b>19</b>   | <b>0</b>   | <b>3</b>    | <b>neg</b>  | <b><i>No dementia</i></b> |
| <b>20</b>   | <b>0</b>   | <b>2</b>    | <b>neg</b>  | <b><i>No dementia</i></b> |
| <b>21</b>   | <b>1</b>   | <b>4</b>    | <b>A</b>    | <b><i>No dementia</i></b> |
| <b>22</b>   | <b>0</b>   | <b>2</b>    | <b>neg</b>  | <b><i>No dementia</i></b> |

**Supplementary Figure 1: 3D scatterplot showing Thal phase (x-axis), CERAD score (y-axis), Braak stage (z-axis) and cognitive status of 21 LATE-NC donors. CERAD score 0, 1, 2, 3 is equivalent to CERAD score negative, A, B, C in Supplemental Table 1 respectively.**

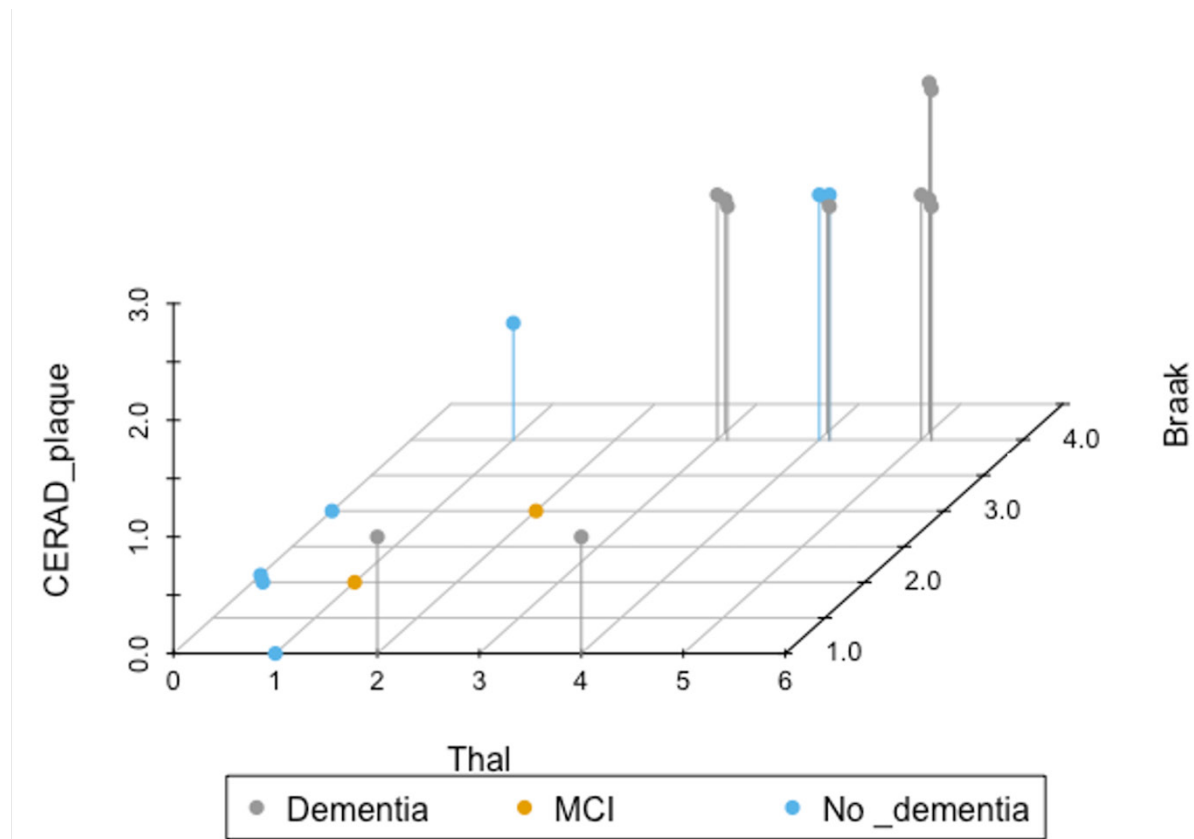

**Supplementary Table 5: Results from mixed effects regression models assessing the longitudinal relationship between individual NPI items and diagnostic group.** Values are  $\beta$ -coefficients (to one decimal place) for NPI subscales in the NPI sample (N=131) using random effects models, with 95% confidence intervals (CI) before and after adjustment for cognitive (MMSE) and demographic (age, sex and years of education) factors, and follow up time relative to death (months). Results with  $p < 0.05$  are indicated by (\*\*) and were not adjusted for multiple comparisons, otherwise results were not significant. Abbreviations: ADNC = Alzheimer's disease neuropathological change, LATE-NC = Limbic-predominant age-related TDP-43 encephalopathy neuropathological change, MMSE = Mini-mental state examination, NPI = Neuropsychiatric inventory, M=males, F=females.

| NPI score        | Unadjusted model $\beta$ (95% CI) |                 | Adjusted model $\beta$ (95% CI) |                             |                             |                |                               |                               |                 |
|------------------|-----------------------------------|-----------------|---------------------------------|-----------------------------|-----------------------------|----------------|-------------------------------|-------------------------------|-----------------|
|                  | Group (vs mixed)                  |                 | Group (vs mixed)                |                             | Sex (M vs F)                | Age (years)    | Years of education            | MMSE                          | Time (months)   |
|                  | Pure ADNC                         | Pure LATE-NC    | Pure ADNC                       | Pure LATE-NC                |                             |                |                               |                               |                 |
| Delusions        | 0.2 (-0.7-1.0)                    | -0.4 (-1.8-0.9) | -0.4 (-2.3-1.4)                 | -0.4 (-2.8-1.9)             | 1.8 (0.4-3.2),<br>p=0.013** | 0.0 (-0.0-0.1) | -0.1 (-0.3-0.1)               | -0.1 (-0.1-0.0),<br>p=0.006** | -0.0 (-0.0-0.0) |
| Hallucinations   | 0.5 (-0.3-1.2)                    | 0.3 (-0.2-1.0)  | 1.0 (-0.6-2.4)                  | 0.5 (-1.4-2.3)              | 0.9 (-0.2-2.1)              | 0.0 (-0.0-0.1) | -0.1 (-0.3-0.0)               | -0.1 (-0.1-0.0),<br>p=0.021** | -0.0 (-0.0-0.0) |
| Agitation        | 0.4 (-0.8-1.6)                    | -0.2 (-2.1-1.7) | 2.3 (0.7-3.8),<br>p=0.005**     | 0.9 (-1.1-2.9)              | -0.0 (-1.2-1.2)             | 0.0 (-0.0-0.1) | -0.1(-0.3-0.0)                | -0.1 (-0.2-0.0),<br>p=0.001** | -0.0 (-0.0-0.0) |
| Depression       | 0.5 (-0.4-1.3)                    | 0.3 (-1.1-1.6)  | 1.1 (-0.7-2.8)                  | 0.7 (-1.5-2.9)              | 0.5 (-0.8-1.8)              | 0.0 (-0.1-0.1) | -0.2 (-0.4-0.0),<br>p=0.034** | 0.0 (-0.1-0.1)                | 0.0 (-0.0-0.0)  |
| Anxiety          | 0.4 (-0.4-1.2)                    | 0.4 (-0.9-1.7)  | 0.5 (-1.3-2.2)                  | -0.7 (-2.9-1.5)             | -0.1 (-1.4-1.3)             | 0.0 (-0.1-0.1) | -0.1 (-0.2-0.1)               | -0.0 (-0.1-0.1)               | -0.0 (-0.0-0.0) |
| Elation/euphoria | 0.2 (-0.1-0.5)                    | 0.1 (-0.3-0.5)  | 0.3 (-0.2-0.8)                  | 0.4 (-0.3-1.0)              | 0.2 (-0.2-0.6)              | 0.0 (-0.0-0.0) | -0.0 (-0.1-0.0)               | -0.0 (-0.0-0.0)               | 0.0 (-0.0-0.0)  |
| Apathy           | 0.6 (-1.0-2.3)                    | -1.1 (-3.7-1.4) | 1.1 (-0.7-2.8)                  | 1.2 (-1.1-3.5)              | -0.4 (-1.8-0.9)             | 0.0 (-0.1-0.1) | 0.0 (-0.1-0.2)                | -0.2 (-0.3-0.1)               | 0.0 (-0.0-0.1)  |
| Disinhibition    | 0.5 (-0.2-1.2)                    | 1.0 (-0.1-2.1)  | 0.4 (-0.3-1.1)                  | 1.5 (0.5-2.5),<br>p=0.002** | 0.2 (-0.4-0.8)              | 0.0 (-0.0-0.0) | -0.1 (-0.1-0.0)               | -0.0 (-0.1-0.0),<br>p=0.020** | 0.0 (-0.0-0.0)  |

|                   |                 |                 |                |                |                |                |                 |                                 |                |
|-------------------|-----------------|-----------------|----------------|----------------|----------------|----------------|-----------------|---------------------------------|----------------|
| Irritability      | 0.6 (-0.4-1.6)  | 0.5 (-1.2-2.1)  | 1.4 (-0.6-3.4) | 0.9 (-1.5-3.5) | 0.1 (-1.4-1.6) | 0.1 (-0.0-0.2) | -0.1 (-0.3-0.1) | -0.1 (-0.1- -0.0),<br>p=0.029** | 0.0 (-0.0-0.0) |
| Motor disturbance | 0.4 (-1.0-1.8)  | -1.1 (-3.3-1.2) | 1.5 (0.1-2.9)  | 0.4 (-1.4-2.3) | 0.2 (-0.9-1.3) | 0.1 (-0.0-0.1) | -0.1 (-0.2-0.1) | -0.1 (-0.2- -0.1)               | 0.0 (-0.0-0.0) |
| Sleep             | 1.0 (-0.4-2.4)  | -0.2 (-2.4-2.0) | 1.6 (-0.3-3.5) | 1.8 (-0.6-4.2) | 0.5 (-0.9-1.9) | 0.0 (-0.1-0.1) | -0.0 (-0.2-0.2) | -0.1 (-0.2- -0.0),<br>p=0.004** | 0.0 (-0.0-0.0) |
| Appetite          | -0.4 (-1.5-0.6) | -0.3 (-2.1-1.4) | 0.1 (-1.3-1.5) | 1.2 (-0.7-3.0) | 0.2 (-0.9-1.3) | 0.0 (-0.0-0.1) | -0.1 (-0.3-0.0) | -0.0 (-0.1-0.0)                 | 0.0 (-0.0-0.0) |
